# Supplementary material
Source: HighWire-hosted journal article supplement (https://bmjopen.bmj.com/content/7/9/e017946)
Supplement: inline-supplementary-material-1 [file inline-supplementary-material-1.pdf]

Supplementary table S1. Number of Teeth in Relation to Incident Functional Disability (n=12,370).

| Number of Teeth | Participants, n | Person-years | Events, n (%) | Hazard Ratio (95% Confidence Interval) |                       |
|-----------------|-----------------|--------------|---------------|----------------------------------------|-----------------------|
|                 |                 |              |               | Model 1 <sup>*1</sup>                  | Model 2 <sup>*2</sup> |
| ≥20             | 4,047           | 21,152       | 476 (11.8)    | 1.00 (reference)                       | 1.00 (reference)      |
| 10-19           | 3,108           | 15,729       | 530 (17.1)    | 1.19 (1.05-1.35)                       | 1.15 (1.01-1.30)      |
| 0-9             | 5,215           | 24,700       | 1,323 (25.4)  | 1.31 (1.18-1.47)                       | 1.20 (1.07-1.34)      |
| P-trend         | -               | -            | -             | <.001                                  | .002                  |

\*<sup>1</sup>Model 1: Adjusted for age (65-69, 70-74, 75-79, 80-84, and ≥85 y) and sex.

\*<sup>2</sup>Model 2: Adjusted for model 1 + education level (age upon final graduation from school <16, 16-18, ≥19 y, missing), smoking (never, former, current, missing), alcohol drinking (never, former, current, missing), body mass index (kg/m<sup>2</sup>; <18.5, 18.5-24.9, ≥25.0, missing), time spent walking daily (<30 min/d, 30 min/d-1h/d, >1h/d, missing), history of disease (stroke, hypertension, myocardial infarction, diabetes mellitus), psychological distress score (<13, ≥13, missing), energy intake (sex-specific tertile, missing), and protein intake (sex-specific tertile, missing).

**Title:** Impact of Oral Self-care on Incident Functional Disability in Elderly Japanese: The Ohsaki Cohort 2006 Study

**Authors:** Shino Bando MSc, <sup>1</sup> Yasutake Tomata PhD, <sup>1</sup> Jun Aida DDS, PhD, <sup>2</sup> Kemmyo Sugiyama MD, PhD, <sup>1</sup> Yumi Sugawara PhD, <sup>1</sup> and Ichiro Tsuji MD, PhD <sup>1</sup>
