# Supplementary material
Source: HighWire-hosted journal article supplement (https://bmjopen.bmj.com/content/7/9/e017946)
Supplement: inline-supplementary-material-2 [file inline-supplementary-material-2.pdf]

Supplementary Table S2. The Relationship Between the Reason for the Dental Visits and Incident Functional Disability According to Number of Teeth (n=12,370).

| Dental visits and Number of Teeth                  | Participants, n | Person-years | Events, n (%) | Hazard Ratio (95% Confidence Interval) |                       |
|----------------------------------------------------|-----------------|--------------|---------------|----------------------------------------|-----------------------|
|                                                    |                 |              |               | Model 1 <sup>*1</sup>                  | Model 2 <sup>*2</sup> |
| <b>≥1 dental visits for treatment per year</b>     |                 |              |               |                                        |                       |
| ≥20                                                | 4,047           | 21,152       | 476 (11.8)    | 1.00 (reference)                       | 1.00 (reference)      |
| 10-19 with dental visits                           | 1,972           | 10,015       | 330 (16.7)    | 1.17 (1.02-1.35)                       | 1.15 (0.99-1.32)      |
| 10-19 with no dental visits                        | 1,136           | 5,713        | 200 (17.6)    | 1.23 (1.04-1.45)                       | 1.15 (0.98-1.36)      |
| 0-9 with dental visits                             | 2,284           | 11,214       | 513 (22.5)    | 1.25 (1.10-1.42)                       | 1.14 (1.00-1.30)      |
| 0-9 with no dental visits                          | 2,931           | 13,484       | 810 (27.6)    | 1.36 (1.21-1.54)                       | 1.24 (1.10-1.40)      |
| <b>≥1 dental visits for other reasons per year</b> |                 |              |               |                                        |                       |
| ≥20                                                | 4,047           | 21,152       | 476 (11.8)    | 1.00 (reference)                       | 1.00 (reference)      |
| 10-19 with dental visits                           | 1,065           | 5,464        | 169 (15.9)    | 1.11 (0.93-1.33)                       | 1.07 (0.90-1.28)      |
| 10-19 with no dental visits                        | 2,043           | 2,043        | 361 (17.7)    | 1.23 (1.07-1.41)                       | 1.19 (1.03-1.36)      |
| 0-9 with dental visits                             | 1,026           | 4,983        | 240 (23.4)    | 1.35 (1.15-1.58)                       | 1.21 (1.03-1.42)      |
| 0-9 with no dental visits                          | 4,189           | 19,716       | 1083 (25.9)   | 1.30 (1.17-1.46)                       | 1.19 (1.06-1.34)      |

\*<sup>1</sup>Model 1: Adjusted for age (65-69, 70-74, 75-79, 80-84, and ≥85 y) and sex.

\*<sup>2</sup>Model 2: Adjusted for model 1 + education level (age upon final graduation from school <16, 16-18, ≥19 y, missing), smoking (never, former, current, missing), alcohol drinking (never, former, current, missing), body mass index (kg/m<sup>2</sup>; <18.5, 18.5-24.9, ≥25.0, missing), time spent walking daily (<30 min/d, 30 min/d-1h/d, >1h/d, missing), history of disease (stroke, hypertension, myocardial infarction, diabetes mellitus), psychological distress score (<13, ≥13, missing), energy intake (sex-specific tertile, missing), and protein intake (sex-specific tertile, missing).

\*<sup>3</sup>Other reason is getting dental checkup and scaling, for example.

**Title:** Impact of Oral Self-care on Incident Functional Disability in Elderly Japanese: The Ohsaki Cohort 2006 Study

**Authors:** Shino Bando MSc, <sup>1</sup> Yasutake Tomata PhD, <sup>1</sup> Jun Aida DDS, PhD, <sup>2</sup> Kemmyo Sugiyama MD, PhD, <sup>1</sup> Yumi Sugawara PhD, <sup>1</sup> and Ichiro Tsuji MD, PhD <sup>1</sup>
